# Supplementary material for: Poly[platinum(iv)-alt-PEI]/Akt1 shRNA complexes for enhanced anticancer therapy
Source: Royal Society of Chemistry journal article supplement (doi:10.1039/c6ra16435h), 2016-01-01
Supplement: c6ra16435h1.pdf [file c6ra16435h1.pdf]

## Supplementary Material

### Poly[platinum(IV)-*alt*-PEI]/Akt1 shRNA complexes for enhanced anticancer Therapy

Jia-Liang Zhang,<sup>a</sup> Jia-Hui Gong,<sup>b</sup> Lei Xing,<sup>b</sup> Peng-Fei Cui,<sup>b</sup> Jian-Bin Qiao,<sup>b</sup> Yu-Jing He,<sup>b</sup> Jin-Yuan Lyu,<sup>b</sup> Shunai Che,<sup>a</sup> Tuo jin\*<sup>d</sup> and Hu-Lin Jiang\*<sup>b,c</sup>

<sup>a</sup>*School of Chemistry and Chemical Engineering, State Key Laboratory of Metal Matrix Composites, Shanghai Jiao Tong University, 800 Dongchuan Road, Shanghai, 200240 (P.R. China)*

<sup>b</sup>*State Key Laboratory of Natural Medicines, Department of Pharmaceutics, China Pharmaceutical University, Nanjing, (P.R. China)*

<sup>c</sup>*Jiangsu Key Laboratory of Drug Screening, China Pharmaceutical University, Nanjing, (P.R. China)*

<sup>d</sup>*School of Pharmacy, Shanghai Jiao Tong University 800 Dongchuan Rd, Shanghai, 200240 (P.R. China)*

#### Correspondence:

Hu-Lin Jiang\*<sup>b,c</sup>

State Key Laboratory of Natural Medicines, Department of Pharmaceutics, China Pharmaceutical University, Nanjing 210009, P. R. China.

Tel: +86-025-83271027, Fax: +86-025-83271027.

Email: jianghulin3@163.com

Tuo jin\*<sup>d</sup>

School of Pharmacy, Shanghai Jiao Tong University 800 Dongchuan Rd, Shanghai, 200240, P.R. China

Tel: +86-0021-34204695; Fax: +86-021-34205072

Email: tjjin@sjtu.edu.cn

## **Materials and Methods**

### **FTIR spectrum measurement**

The FTIR spectrum of DHP was carried out using the KBr disk method in the wavelength region of 4000-400  $\text{cm}^{-1}$  by FTIR spectrophotometer. (Bruker, TENSOR 27)

### **Energy Dispersive X-Ray Spectroscopy (EDX) measurement**

The EDX measurement was carried out using JEOL JEM-2100 equipped with an IN-CA x-sight at 200 kV. The area of DP/shAkt1 nanoparticles was analysed by EDX to reveal atomic components.

### **Endosomal buffering capacity of DP**

The buffering capacity of DP was measured by acid-base titration over the pH range of 10.0 to 3.0. Briefly, 2 mg of DP and PEI 25K were dissolved in 10 mL of 0.15 M NaCl solution, respectively. The solution was brought to pH of 10.0 using 0.1 M NaOH and then titrated with 0.1 M HCl solution until the pH value decreased to 3.0. The pH of solutions was measured by a pH meter (Satorious, German). Meanwhile, 0.15 M NaCl solution, PEI 25K solution were titrated in the same way as controls, respectively.

### **Released Pt(II) species by MALDI-TOF-MS**

DP (10 mg) was dissolved in distilled water (2 mL), and then dialyzed against distilled water (molecular weight cut-off = 1000 Da) in the presence of 5 mM sodium ascorbate. After dialysis for 48 h, the solution out of the dialysis bag was collected in a vial, to which 2'-deoxyguanosine 5'-monophosphate sodium salt hydrate (GG, Sigma Aldrich) was added to a final concentration of 50  $\mu$ M. The vial was kept in the dark and shaken for 24 h at 37 °C, and then aliquots were collected for MALDI-TOF-MS study (AB SCIEX TOF/TOF 5800).

### **Release profile of platinum from DP *in vitro***

The *in vitro* release of platinum from DP was evaluated as previously reported.<sup>1</sup> DP (50 mg) was dissolved in 2 mL PBS (pH 7.4, 100 mM), then transferred into a pre-swelled dialysis bag (molecular weight cut-off = 1500 Da), and immersed into 100 mL PBS (pH 7.4, 100 mM). The drug release experiment was carried out at 37 °C with stirring at 120 rpm. At indicated time points (1 h, 4 h, 12 h, 24 h, 48 h, 72 h), 1.0 mL sample solution was withdrawn and its platinum concentration was measured by ICP-MS (Agilent 7700e). Equal volume of fresh PBS was immediately replenished.

### **<sup>195</sup>Pt NMR spectroscopy**

For <sup>195</sup>Pt NMR measurement, DP was dissolved in D<sub>2</sub>O at a concentration of 30 mg mL<sup>-1</sup>. <sup>195</sup>Pt NMR spectra were recorded on a Bruker AVANCE-400 NMR spectrometer. Chemical shifts were externally referenced to K<sub>2</sub>PtCl<sub>6</sub> in D<sub>2</sub>O ( $\delta = 0$  ppm).

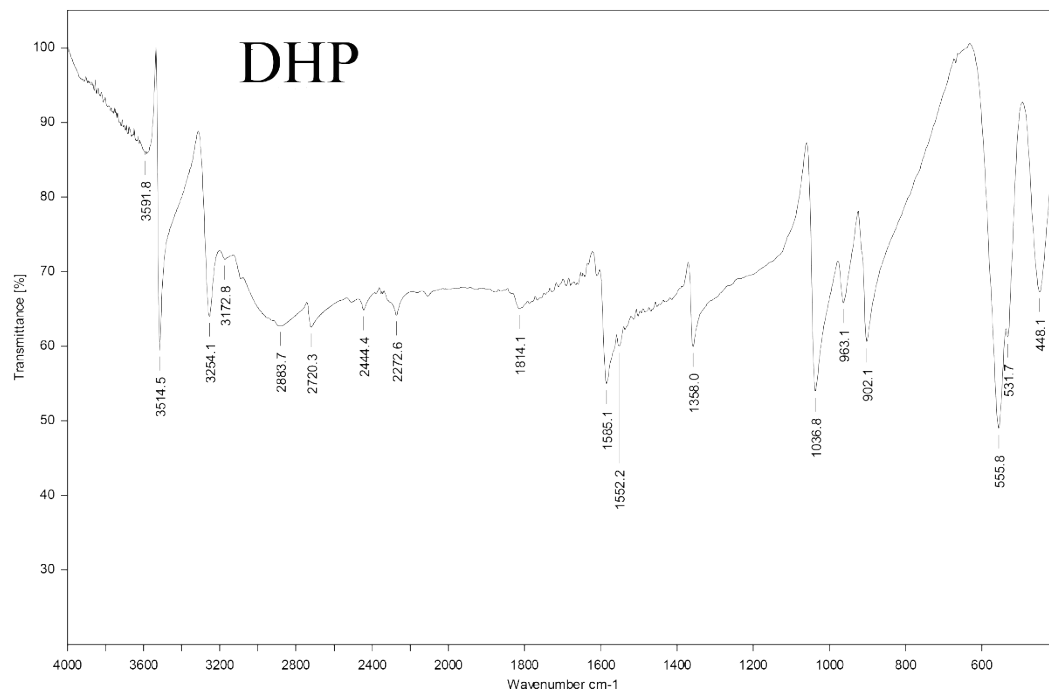

**Figure S1. FTIR spectrum of DHP.**

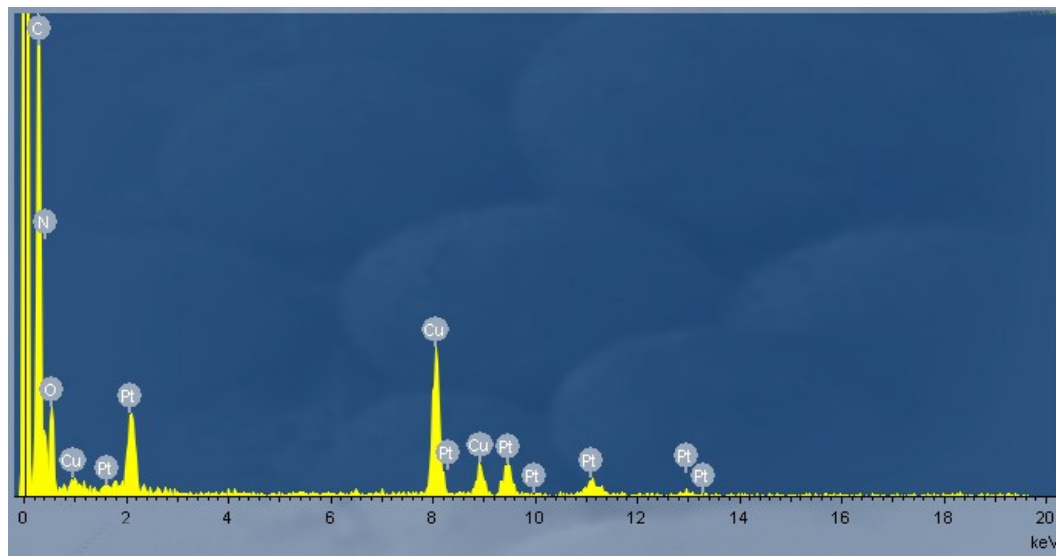

**Figure S2. EDX spectrum of DP/shAkt1 complexes.**

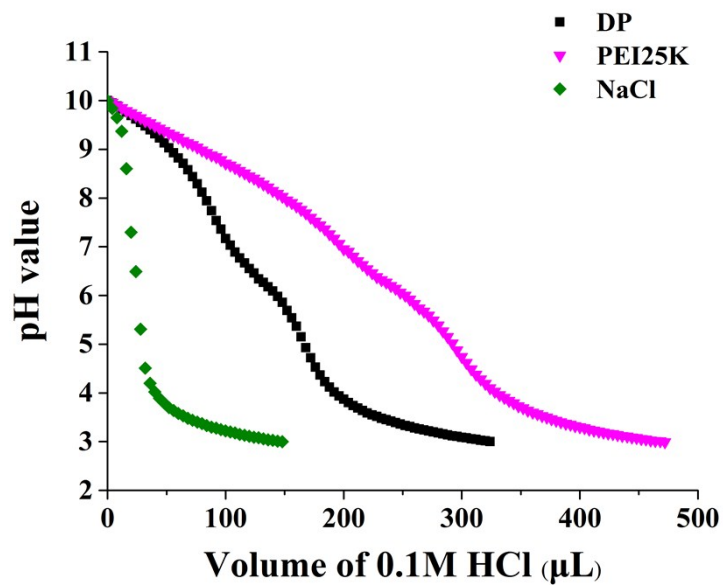

**Figure S3.** Acid-base titration curves of NaCl, DP and PEI 25K obtained by titrating  $0.2 \text{ mg mL}^{-1}$  aqueous solutions (starting pH 10.0, adjusted by 0.1M NaOH) of the samples in 0.15 M NaCl solution to pH 3.0 with 0.1M HCl.

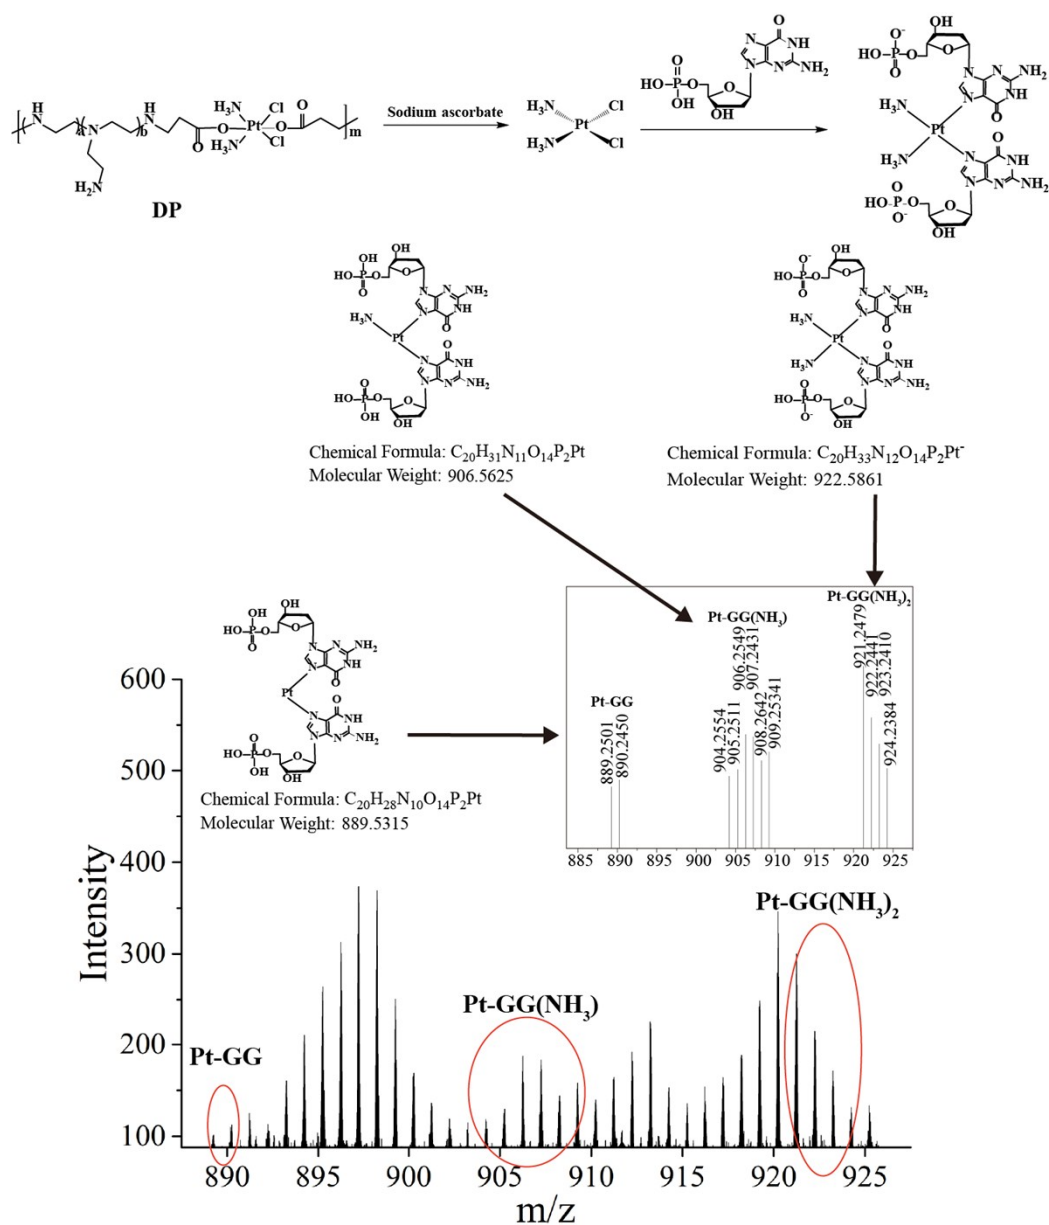

**Figure S4.** MALDI-TOF-MS chromatogram of Pt-GG adducts obtained by the reaction of DP and 5'-GMP in the presence of sodium ascorbate. Exhibited isotopic peak pattern confirms the presence of Pt species in Pt-GG adduct.

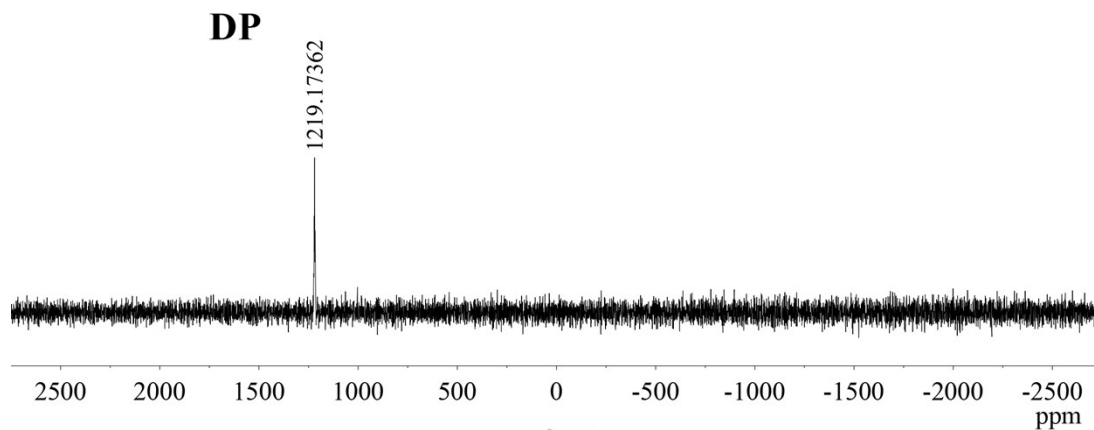

**Figure S5.**  $^{195}\text{Pt}$  NMR of DP in  $\text{D}_2\text{O}$

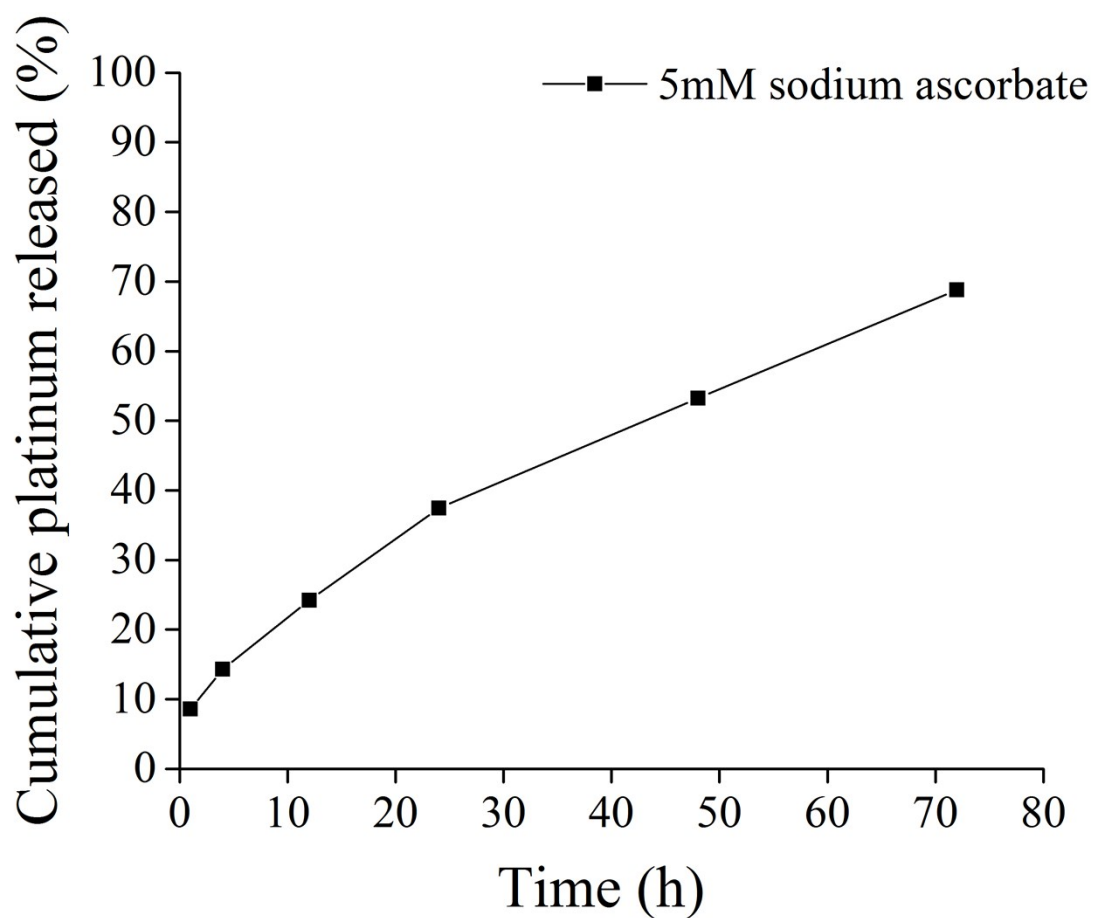

**Figure S6.** Platinum release profiles of DP.

**Table S1.** The molecular weight and polydispersity index of DP.

|           |             |             |             |
|-----------|-------------|-------------|-------------|
|           | <b>Mw</b>   | <b>Mn</b>   | <b>PDI</b>  |
| <b>DP</b> | <b>2654</b> | <b>1935</b> | <b>1.37</b> |

**Table S2.** The theoretical and actual platinum(IV) prodrug content in the polymer synthesized by DHPAA and PEI 800 with different molar ratios. (means  $\pm$  SD, n=3).

| Molar ratios of DHPAA/PEI 800 | Theoretical platinum (IV) prodrug content (wt%) | Actual platinum (IV) prodrug content (wt%) |
|-------------------------------|-------------------------------------------------|--------------------------------------------|
| 1:1                           | 35.9                                            | 35.946 $\pm$ 0.1243                        |
| 0.5:1                         | 17.95                                           | 18.0546 $\pm$ 0.0248                       |

1. H. Song, H. Xiao, Y. Zhang, H. Cai, R. Wang, Y. Zheng, Y. Huang, Y. Li, Z. Xie and T. Liu, *Journal of Materials Chemistry B*, 2013, **1**, 762-772.
